# Supplementary material for: Polarity and mixed-mode oscillations may underlie different patterns of cellular migration
Source: PubMed Central journal article supplement (PMC10014943; doi:10.1038/s41598-023-31042-8), 2023-03-14
Supplement: 41598_2023_31042_MOESM1_ESM.pdf [file 41598_2023_31042_MOESM1_ESM.pdf]

# Supplementary Material: Polarity and mixed-mode oscillations may underlie different patterns of cellular migration

Lucie Plazen, Jalal Al Rahbani, Claire M. Brown, Anmar Khadra

## S0.1 Derivations of the original six-variable (6V) model

According to the original framework of the 6V model [1,2], Rac and Rho exist in the form of either active/membrane-bound state (i.e., RacGTP and RhoGTP) and inactive/cytosolic state (i.e., RacGDP and RhoGDP). It is hypothesized that the active forms of these proteins mutually inhibit each other's activation [3]; this latter feature represents the key element of the original 6V model.

The connection between paxillin S273 phosphorylation and elevated Rac activity is both active PAK (i.e., RacGTP-bound PAK) and PIX. Active PAK phosphorylates paxillin, whereas PIX is a known RacGEF that is bound to the adhesion as part of the GIT-PIX-PAK complex. As the level of S273-phosphorylated paxillin ( $Pax_p$ ) increases, so does the binding of PIX to the adhesion. The increased GEF activity that results from PIX accumulation causes a rise in the Rac activation rate.

To derive the equations that describe the dynamics of this system, we will follow the same steps outlined in [2]. These equations are based on a set of reactions that are all listed in [2]

Crosstalk between the two proteins Rac and Rho (i.e., their mutual inhibition of each other) is modelled as a cooperative reduction of their activation rate. In the case of Rac, its RacGEF-dependent activation is expressed in terms of a decreasing Hill function that depends on the concentration of active Rho ( $[RhoGTP]$ ), with a Hill coefficient  $n$  and a half-maximal inhibition  $L_{Rho}$ , whereas Rac inactivation follows mass-action kinetics and is dependent on RacGAP (assumed to be constant). Based on this, the equations governing the dynamics of active and inactive Rac concentrations ( $[RacGTP]$  and  $[RacGDP]$ , respectively) are given by

$$\begin{aligned} \frac{[RacGTP]}{dt} &= k_{Rac}^+[RacGEF] \left( 1 - \frac{[RhoGTP]^n}{L_{Rho}^n + [RhoGTP]^n} \right) [RacGDP] \\ &\quad - k_{Rac}^- [RacGAP] [RacGTP] + k_{PAK}^- \left( [PAK] - [RacGTP] + [Pax_p] - [GIT] - [PIX] - [PAK] - [RacGTP] \right) \\ &\quad - k_{PAK}^+ \left( [PAK] + [Pax_p] - [GIT] - [PIX] - [PAK] \right) [RacGTP] \\ \frac{[RacGDP]}{dt} &= -k_{Rac}^+ [RacGEF] \left( 1 - \frac{[RhoGTP]^n}{L_{Rho}^n + [RhoGTP]^n} \right) [RacGDP] + k_{Rac}^- [RacGAP] [RacGTP] \end{aligned}$$

The dynamics of active and inactive Rho concentrations ( $[RhoGTP]$  and  $[RhoGDP]$ , respectively) are modelled similarly. In this case, the RhoGEF-dependent Rho activation is expressed in terms of a decreasing Hill function that depends on the concentration of active Rac ( $[RacGTP]$ ), with a Hill coefficient  $n$  and a half-maximal inhibition  $L_{Rac}$ , and its inactivation follows mass-action kinetics that is dependent on RhoGAP (assumed to be

constant). With this in mind, we obtain the following equations

$$\begin{aligned}
\frac{[RhoGTP]}{dt} &= k_{Rho}^+[RhoGEF] \\
&\times \left( 1 - \frac{\left( [RacGTP] + [PAK - RacGTP] + [Pax_p - GIT - PIX - PAK - RacGTP] \right)^n}{L_{Rac}^n + \left( [RacGTP] + [PAK - RacGTP] + [Pax_p - GIT - PIX - PAK - RacGTP] \right)^n} \right) \\
&\times [RhoGDP] - k_{Rho}^- [RhoGAP][RhoGTP] \\
\frac{[RhoGDP]}{dt} &= -k_{Rho}^+[RhoGEF] \\
&\times \left( 1 - \frac{\left( [RacGTP] + [PAK - RacGTP] + [Pax_p - GIT - PIX - PAK - RacGTP] \right)^n}{L_{Rac}^n + \left( [RacGTP] + [PAK - RacGTP] + [Pax_p - GIT - PIX - PAK - RacGTP] \right)^n} \right) \\
&\times [RhoGDP] + k_{Rho}^- [RhoGAP][RhoGTP].
\end{aligned}$$

It is important to note that, since PIX is a RacGEF, the total RacGEF concentration ( $[RacGEF]$ ) is given by

$$\begin{aligned}
[RacGEF] &= [RacGEF_b] + [PIX] + [GIT - PIX] + [PIX - PAK] + [GIT - PIX - PAK] \\
&+ [Pax_p - GIT - PIX - PAK] + [Pax_p - GIT - PIX - PAK - RacGTP],
\end{aligned}$$

where  $[RacGEF_b]$  is the concentration of basal level of RacGEFs (assumed to be constant).

The reactions governing the dynamics of paxillin include paxillin phosphorylation/dephosphorylation, and binding/unbinding to/from the GIT-PIX-PAK complex. The phosphorylation of this protein is driven by active PAK (i.e., RacGTP-bound PAK) and is expressed as a Hill function with a Hill coefficient  $n$  and half-maximum activation  $L_{PAK}$ , whereas its dephosphorylation follows mass-action kinetics and depends on the concentration of the phosphatase PP2A (assumed to be constant). By letting  $[Pax_p]$  and  $[Pax]$  denote the concentrations of phosphorylated and unphosphorylated paxillin, respectively, we obtain the following equations for these two molecular species

$$\begin{aligned}
\frac{[Pax_p]}{dt} &= B \frac{\left( [PAK - RacGTP] + [Pax_p - GIT - PIX - PAK - RacGTP] \right)^n}{L_{PAK}^n + \left( [PAK - RacGTP] + [Pax_p - GIT - PIX - PAK - RacGTP] \right)^n} [Pax] \\
&- k_{Pax}^- [PP2A][Pax_p] + k_C^- [Pax_p - GIT - PIX - PAK] \\
&- k_C^+ [Pax_p][GIT - PIX - PAK] \\
\frac{[Pax]}{dt} &= -B \frac{\left( [PAK - RacGTP] + [Pax_p - GIT - PIX - PAK - RacGTP] \right)^n}{L_{PAK}^n + \left( [PAK - RacGTP] + [Pax_p - GIT - PIX - PAK - RacGTP] \right)^n} [Pax] \\
&+ k_{Pax}^- [PP2A][Pax_p],
\end{aligned}$$

where  $B$  is paxillin maximum phosphorylation rate.

The equations governing the dynamics of all intermediates considered in this system are listed below (see [2])

for the whole list of chemical reactions that produce these equations)

$$\begin{aligned} \frac{d[PAK]}{dt} &= k_{PAK}^- [PAK - RacGTP] - k_{PAK}^+ [PAK][RacGTP] + k_X^- [GIT - PIX - PAK] \\ &\quad - k_X^+ [GIT - PIX][PAK] + k_X^- [PIX - PAK] - k_X^+ [PIX][PAK] \end{aligned}$$

$$\begin{aligned} \frac{d[PAK - RacGTP]}{dt} &= -k_{PAK}^- [PAK - RacGTP] + k_{PAK}^+ [PAK][RacGTP] + k_X^- [PIX - PAK - RacGTP] \\ &\quad - k_X^+ [PIX][PAK - RacGTP] \end{aligned}$$

$$\frac{d[GIT - PIX]}{dt} = k_G^+ [GIT][PIX] - k_G^- [GIT - PIX] + k_X^- [GIT - PIX - PAK] - k_X^+ [GIT - PIX][PAK]$$

$$\begin{aligned} \frac{d[PIX - PAK]}{dt} &= k_X^+ [PIX][PAK] - k_X^- [PIX - PAK] + k_G^- [GIT - PIX - PAK] - k_G^+ [GIT][PIX - PAK] \\ &\quad + k_{PAK}^- [PIX - PAK - RacGTP] - k_{PAK}^+ [PIX - PAK][RacGTP] \end{aligned}$$

$$\begin{aligned} \frac{d[PIX - PAK - RacGTP]}{dt} &= k_X^+ [PIX][PAK - RacGTP] - k_X^- [PIX - PAK - RacGTP] \\ &\quad + k_{PAK}^+ [PIX - PAK][RacGTP] - k_{PAK}^- [PIX - PAK - RacGTP] \end{aligned}$$

$$\begin{aligned} \frac{d[GIT - PIX - PAK]}{dt} &= k_X^+ [GIT - PIX][PAK] - k_X^- [GIT - PIX - PAK] + k_G^+ [GIT][PIX - PAK] \\ &\quad - +k_G^- [GIT - PIX - PAK] + k_C^- [Pax_p - GIT - PIX - PAK] \\ &\quad - k_C^+ [Pax_p][GIT - PIX - PAK] \end{aligned}$$

$$\begin{aligned} \frac{d[Pax_p - GIT - PIX - PAK]}{dt} &= k_C^+ [Pax_p][GIT - PIX - PAK] - k_C^- [Pax_p - GIT - PIX - PAK] \\ &\quad + k_{PAK}^- [Pax_p - GIT - PIX - PAK - RacGTP] \\ &\quad - k_{PAK}^+ [Pax_p - GIT - PIX - PAK][RacGTP] \end{aligned}$$

$$\begin{aligned} \frac{d[Pax_p - GIT - PIX - PAK - RacGTP]}{dt} &= -k_{PAK}^- [Pax_p - GIT - PIX - PAK - RacGTP] + \\ &\quad k_{PAK}^+ [Pax_p - GIT - PIX - PAK][RacGTP]. \end{aligned}$$

After setting these latter equations to steady state using quasi-steady-state approximation, the concentrations of each intermediate can be expressed as a function of  $[RacGTP]$ ,  $[Pax_p]$ ,  $[GIT]$ ,  $[PIX]$  and  $[PAK]$ , where  $[GIT]$

and  $[PIX]$  are assumed to be constant. These steady state expressions are given by

$$\begin{aligned}
[PAK - RacGTP] &= \frac{k_{PAK}^+}{k_{PAK}^-} [PAK][RacGTP] \\
[GIT - PIX] &= \frac{k_G^+}{k_G^-} [GIT][PIX] = constant \\
[PIX - PAK] &= \frac{k_X^+}{k_X^-} [PIK][PAK] \\
[PIX - PAK - RacGTP] &= \frac{k_X^+ k_{PAK}^+}{k_X^- k_{PAK}^-} [PIK][PAK][RacGTP] \\
[Pax_p - GIT - PIX - PAK] &= \frac{k_G^+ k_X^+ k_C^+}{k_G^- k_X^- k_C^-} [GIT][PIK][PAK][Pax_p] \\
[Pax_p - GIT - PIX - PAK - RacGTP] &= \frac{k_G^+ k_X^+ k_C^+ k_{PAK}^+}{k_G^- k_X^- k_C^- k_{PAK}^-} [GIT][PIK][PAK][Pax_p][RacGTP].
\end{aligned}$$

The expression for the steady state of  $[PAK]$  is derived from the total concentration of PAK ( $PAK_{tot}$ ; assumed to be constant), as follows

$$\begin{aligned}
[PAK_{tot}] &= [PAK] + [PIX - PAK] + [GIT - PIX - PAK] + [Pax_p - GIT - PIX - PAK] + [PAK - RacGTP] \\
&\quad + [PIX - PAK - RacGTP] + [Pax_p - GIT - PIX - PAK - RacGTP].
\end{aligned}$$

Substituting the steady state concentrations of the various intermediates appearing in the latter equation, we obtain

$$\begin{aligned}
\frac{[PAK_{tot}]}{[PAK]} &= k_X [PIX] + k_G k_X [GIT][PIX] + k_G k_X k_C [GIT][PIX][Pax_p] + \alpha k_X [PIX][RacGTP] \\
&\quad + \alpha k_G k_X k_C [GIT][PIX][Pax_p][RacGTP] + 1 + \alpha [RacGTP],
\end{aligned}$$

where  $k_G = \frac{k_G^+}{k_G^-}$ ,  $k_X = \frac{k_X^+}{k_X^-}$ ,  $k_C = \frac{k_C^+}{k_C^-}$  and  $\alpha = \frac{k_{PAK}^+}{k_{PAK}^-}$ . These newly defined parameters represent the association constant for  $PIX - PAK$  binding ( $k_X$ ), the association constant for  $GIT - PIX$  binding ( $k_G$ ), the association constant for  $Pax_p - GIT$  binding ( $k_C$ ) and the affinity constant for  $PAK - RacGTP$  binding ( $\alpha$ ). Solving for  $[PAK]$  and rearranging, we obtain

$$[PAK] = \frac{[PAK_{tot}]}{(1 + k_X [PIX] + k_G k_X k_C [GIT][PIX][Pax_p])(1 + \alpha [RacGTP]) + k_G k_X [GIT][PIX]}$$

This latter expression for  $[PAK]$  can be used to derive the ratio of  $[PAK]$ -to- $[PAK_{tot}]$  (denoted by  $K_i^*$ ) as follows

$$K_i^* = \frac{[PAK]}{[PAK_{tot}]} = \{(1 + k_X [PIX] + k_G k_X k_C [GIT][PIX][Pax_p])(1 + \alpha [RacGTP]) + k_G k_X [GIT][PIX]\}^{-1}.$$

It follows that the scaled concentration of active PAK (denoted by  $[PAK^*]$ ) is given by

$$K = \frac{[PAK^*]}{[PAK]_{tot}} = \alpha_R R (1 + k_x [PIX] + k_G k_X k_C [GIT][PIX][Pax_{tot}]) K_i^*.$$

Since PIX is a known RacGEF, bound to the adhesion as part of the GIT-PIX-PAK complex, we can define PIX-dependent Rac activation  $I_K^*$  as follows

$$\begin{aligned}
I_K^* &= I'_K ([PIX - PAK] + [GIT - PIX - PAK] + [Pax_p - GIT - PIX - PAK] + [PIX - PAK - RacGTP] \\
&\quad + [Pax_p - GIT - PIX - PAK - RacGTP]),
\end{aligned}$$

where  $I'_K$  is the PIX-mediated rate of Rac activation. Substituting the concentrations of each intermediate species using their concentrations at steady state, we obtain

$$\begin{aligned}
I_K^* &= I'_K ([PAK] (k_X [PIX] + k_G k_X [GIT][PIX] + k_G k_X k_C [GIT][PIX][Pax_p] + \alpha k_X [PIX][RacGTP] \\
&\quad + \alpha k_G k_X k_C [GIT][PIX][Pax_p][RacGTP] + 1 + \alpha [RacGTP])) \\
&\quad + I'_K ([PAK] (\frac{[PAK_{tot}]}{[PAK]} - 1 - \alpha [RacGTP])) + I'_K [PAK_{tot}] (1 - \frac{[PAK]}{[PAK_{tot}]} - \alpha \frac{[PAK][RacGTP]}{[PAK_{tot}]}).
\end{aligned}$$

Letting  $I_K = I'_K [PAK_{tot}]$ ,  $R = \frac{[RacGTP]}{[Rac_{tot}]}$  and  $\alpha_R = \alpha [Rac_{tot}]$ , where  $[Rac_{tot}]$  is the total concentration of Rac (assumed constant), we get

$$I_K^* = I_K (1 - K_i^* (1 + \alpha_R R)).$$

To determine the expression level of unphosphorylated paxillin,  $P_i$ , we first assume a constant total concentration of paxillin ( $[Pax_{tot}]$ ), which includes unphosphorylated and phosphorylated paxillin and any complexes which contain them. Given this assumption, the concentration of unphosphorylated paxillin is

$$[Pax] = [Pax_{tot}] - [Pax_p] - [Pax_p - GIT - PIX - PAK] - [Pax_p - GIT - PIX - PAK - RacGTP]$$

After substituting the steady state expressions for the intermediate complexes, we obtain

$$[Pax] = [Pax_{tot}] - [Pax_p] (1 + k_G k_X k_C [GIT][PIX][PAK] (1 + \alpha [RacGTP])).$$

Scaling the latter equation by  $[Pax_{tot}]$  and substituting the scaled variables  $P = \frac{[Pax_p]}{[Pax_{tot}]}$ ,  $P_i = \frac{[Pax]}{[Pax_{tot}]}$  give

$$P_i = 1 - P (1 + k_G k_X k_C [GIT][PIX][PAK_{tot}] K_i^* (1 + \alpha_R R)).$$

Finally, scaling  $[RhoGTP]$  and  $[RhoGDP]$  by total Rho concentration ( $[Rho_{tot}]$ ) (assumed constant) and letting  $\rho = \frac{[RhoGTP]}{[Rho_{tot}]}$  and  $\rho_i = \frac{[RhoGDP]}{[Rho_{tot}]}$ , as well as scaling  $[RacGDP]$  by  $[Rac_{tot}]$  and letting  $R_i = \frac{[RacGDP]}{[Rac_{tot}]}$ , we obtain a scaled 6V model whose dynamics in the presence of diffusion is given by

$$\begin{aligned} \frac{\partial R}{\partial t} &= (I_R + I_K^*) \left( \frac{L_\rho^n}{L_\rho^n + \rho^n} \right) R_i - \delta_R R + D_R \frac{\partial^2 R}{\partial x^2} \\ \frac{\partial R_i}{\partial t} &= -(I_R + I_K^*) \left( \frac{L_\rho^n}{L_\rho^n + \rho^n} \right) R_i + \delta_R R + D_{R_i} \frac{\partial^2 R_i}{\partial x^2} \\ \frac{\partial \rho}{\partial t} &= I_\rho \left( \frac{L_R^n}{L_R^n + (R + \gamma K)^n} \right) \rho_i - \delta_\rho \rho + D_\rho \frac{\partial^2 \rho}{\partial x^2} \\ \frac{\partial \rho_i}{\partial t} &= -I_\rho \left( \frac{L_R^n}{L_R^n + (R + \gamma K)^n} \right) \rho_i + \delta_\rho \rho + D_{\rho_i} \frac{\partial^2 \rho_i}{\partial x^2} \\ \frac{\partial P}{\partial t} &= B \left( \frac{K^n}{L_K^n + K^n} \right) P_i - \delta_P P + D_P \frac{\partial^2 P}{\partial x^2} \\ \frac{\partial P_i}{\partial t} &= -B \left( \frac{K^n}{L_K^n + K^n} \right) P_i + \delta_P P + D_{P_i} \frac{\partial^2 P_i}{\partial x^2}, \end{aligned}$$

where  $D_x$  ( $x = R, R_i, \rho, \rho_i, P, P_i$ ) is the diffusion coefficient of each molecular species and  $\gamma = \frac{[PAK_{tot}]}{[Rac_{tot}]}$ .

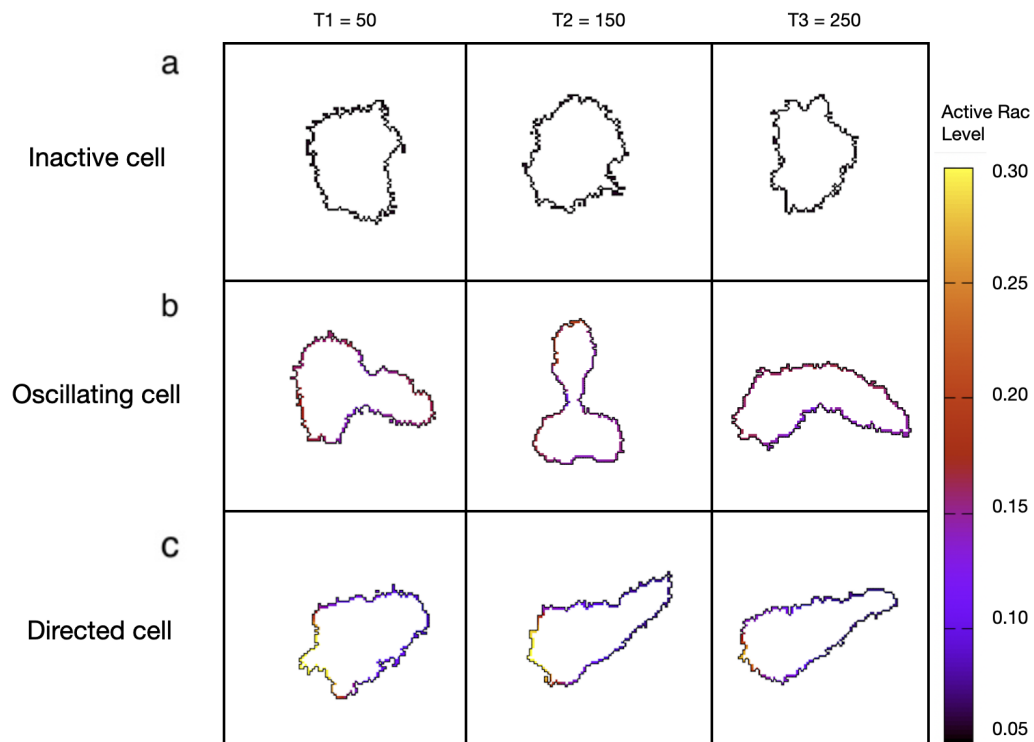

Figure S1: Membrane bound scaled active Rac concentration in simulated CPM cells defines the shapes of (a) inactive, (b) oscillating, and (c) directed cells. Simulations are shown at three different time points:  $T_1 = 50$ ,  $T_2 = 150$  and  $T_3 = 250$  time-steps. Scaled active Rac concentration is colour-coded according to the colour-bar to the right.

| Parameter          | Description                                              | Value           | Unit             | References |
|--------------------|----------------------------------------------------------|-----------------|------------------|------------|
| $I_R$              | Basal Rac activation Rate                                | 0.0035          | $s^{-1}$         | [1]        |
| $\delta_R$         | Rac inactivation rate                                    | 0.025           | $s^{-1}$         | [1]        |
| $L_\rho$           | Rho-dependent half-maximum inhibition of Rac             | 0.34            | unitless         | [1]        |
| $I_\rho$           | Basal Rho activation Rate                                | 0.016           | $s^{-1}$         | [1]        |
| $\delta_\rho$      | Rho inactivation rate                                    | 0.016           | $s^{-1}$         | [1]        |
| $L_R$              | Rac-dependent half-maximum inhibition of Rho             | 0.34            | unitless         | [1]        |
| $\gamma$           | Ratio of total PAK to total Rac                          | 0.3             | unitless         | [1]        |
| $\delta_P$         | Paxillin dephosphorylation rate                          | 0.00041         | $s^{-1}$         | [1]        |
| n                  | Hill coefficient                                         | 4               | unitless         | [1]        |
| $\alpha_P$         | Linearization coefficient in paxillin activation         | 2.7             | unitless         | [1]        |
| $L_K$              | Active PAK-dependent half-maximum activation of paxillin | 5.77            | unitless         | [1]        |
| $I_K$              | Additional Rac activation due to paxillin                | 0.009           | $s^{-1}$         | [1]        |
| $k_G$              | Association constant for GIT-PIX binding                 | 5.71            | $s^{-1}$         | [1]        |
| [GIT]              | Concentration of GIT                                     | 0.11            | $\mu M$          | [1]        |
| $k_X$              | Association constant for PIX-PAK binding                 | 41.7            | $s^{-1}$         | [1]        |
| [PIX]              | Concentration of PIX                                     | 0.069           | $\mu M$          | [1]        |
| $k_C$              | Association constant for $Pax_p$ -GIT binding            | 5               | $s^{-1}$         | [1]        |
| [ $Pax_{tot}$ ]    | Total concentration of paxillin                          | 2.3             | $\mu M$          | [1]        |
| $\alpha_R$         | Affinity constant for PAK-RacGTP binding                 | 15              | unitless         | [1]        |
| $D_R$              | Diffusion coefficient of active Rac                      | 0.0025          | $\mu m^2.s^{-1}$ | [1]        |
| $D_{R_i}$          | Diffusion coefficient of inactive Rac                    | 0.43            | $\mu m^2.s^{-1}$ | [1]        |
| $\epsilon$         | Time constant for $B$                                    | 0.01            | $s^{-1}$         | Estimated  |
| $B_r$              | Resting state of $B$                                     | 10              | unitless         | Estimated  |
| $k_B$              | Recovery rate of $B$ back to its resting state           | 0.04            | unitless         | Estimated  |
| $\gamma_R$         | Strength of $R$ feedback onto $B$                        | 8.6956          | $s^{-1}$         | Estimated  |
| $\eta, \epsilon_B$ | Parameters that guarantee the positivity of $B$          | $10^4, 10^{-4}$ | unitless         | Estimated  |
| $\epsilon_L$       | Time constant of $k_B$                                   | $10^{-5}$       | $s^{-1}$         | Estimated  |
| $\gamma_K$         | Source term                                              | 0.15            | unitless         | Estimated  |

Table S1: Summary of parameter values.

| Parameter       | Description                                                                                    | Value  | References           |
|-----------------|------------------------------------------------------------------------------------------------|--------|----------------------|
| $P_{target}$    | Targeted perimeter                                                                             | 200    | Estimated, [4]       |
| $\lambda_P$     | Weights describing membrane deformation resistance                                             | 0.002  | Estimated and fitted |
| $S_{target}$    | Targeted surface                                                                               | 1200   | Estimated, [5]       |
| $\lambda_S$     | Weights describing membrane deformation resistance                                             | 0.0004 | Estimated and fitted |
| $\lambda_{Act}$ | Weights describing protrusive strength                                                         | 2      | Estimated and fitted |
| MCS Duration    | Ratio between Monte Carlo Step and simulation time                                             | 0.5    |                      |
| Temperature     | Boltzmann probability to accept updates that increase energy                                   | 0.12   | Fitted               |
| Yield           | Offset for Boltzmann probability distribution representing resistance to membrane deformations | 0.1    | Fitted, [6]          |

Table S2: Summary of CPM parameter values.

## References

- [1] Tang, K., Boudreau, C. G., Brown, C. M. & Khadra, A. Paxillin phosphorylation at serine 273 and its effects on rac, rho and adhesion dynamics. *PLoS computational biology* **14**, e1006303 (2018).
- [2] Tang, K. *Mathematical model of paxillin phosphorylation at serine 273 and its effect on Rac, Rho, and adhesion dynamics* (McGill University (Canada), 2018).
- [3] Byrne, K. M. *et al.* Bistability in the rac1, pak, and rhoa signaling network drives actin cytoskeleton dynamics and cell motility switches. *Cell systems* **2**, 38–48 (2016).

- [4] Ouchi, N. B., Glazier, J. A., Rieu, J.-P., Upadhyaya, A. & Sawada, Y. Improving the realism of the cellular potts model in simulations of biological cells. *Physica A: Statistical Mechanics and its Applications* **329**, 451–458 (2003).
- [5] Graner, F. & Glazier, J. A. Simulation of biological cell sorting using a two-dimensional extended potts model. *Physical review letters* **69**, 2033 (1992).
- [6] Käfer, J., Hogeweg, P. & Marée, A. F. M. Moving forward moving backward: directional sorting of chemotactic cells due to size and adhesion differences. *PLoS computational biology* **2**, e56 (2006).
